# Supplementary material for: Biomass chitin-derived honeycomb-like nitrogen-doped carbon/graphene nanosheet networks for applications in efficient oxygen reduction and robust lithium storage
Source: Royal Society of Chemistry journal article supplement (doi:10.1039/c6ta02858f), 2016-01-01
Supplement: c6ta02858f1.pdf [file c6ta02858f1.pdf]

Electronic Supplementary Material (ESI) for Journal of Materials Chemistry A.

This journal is © The Royal Society of Chemistry 2016

## Supporting Information

Biomass chitin-derived honeycomb-like nitrogen-doped  
carbon/graphene nanosheets networks for applications in  
efficient oxygen reduction and robust lithium storage

Bo Wang, Songmei Li,\* Xiaoyu Wu, Jianhua Liu, and Chen Jing

Key Laboratory of Aerospace Advanced Materials and Performance of Ministry of  
Education, School of Materials Science and Engineering, Beihang University, Beijing,  
100191, P. R. China

\* Corresponding author. Tel: +86 10 82317103; fax: +86 10 82317103.

E-mail address: songmei\_li@buaa.edu.cn.

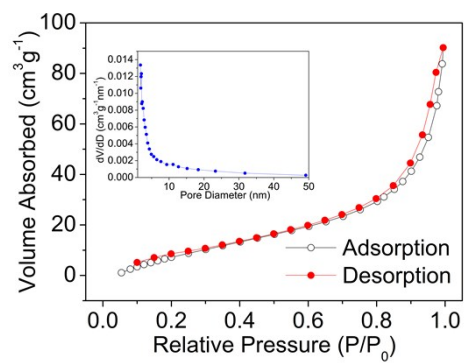

**Fig. S1** Nitrogen adsorption-desorption isotherms and the inset corresponding pore size distribution curves of N-DC nanohybrid films.

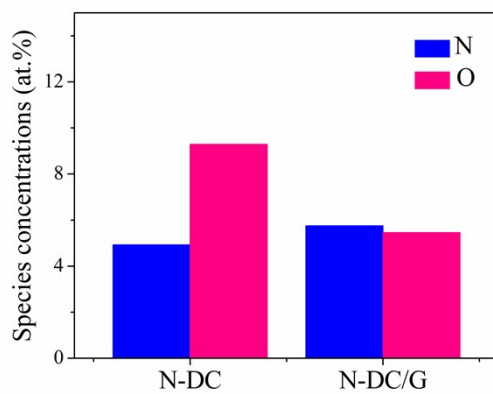

**Fig. S2** N and O atomic contents of N-DC and N-DC/G nanohybrid films calculated from XPS results.
